# Supplementary material
Source: publisher figshare collection journal article supplement (https://rs.figshare.com/ndownloader/files/13214879)
Supplement: Supplementary file 1 [file 13214879]

## Sheet: Sheet1
ID	Age (yrs)	sex (F=0; M=1)	race (White=0;Other=1)	BMI (kg/m2)	Smoker	Hypertension	Diabetes	Trig (mg/dL)	HDL (mg/dL)	LDL (mg/dL)	Glucose (mg/dL)	ICA-CE (--)	CCA-CE (--)	ICA-WT (mm)	CCA-WT (mm)	FlareA (--)	Tort2D (--)	ICA-LSA (--)	ICA-OSA (--)	ICA-RTA (--)	ICA-TSA (--)	ICA-VolRec (--)	ICA-AvgHel (cm/s^2)	CCA-LSA (--)	CCA-OSA (--)	CCA-RTA (--)	CCA-TSA (--)	CCA-VolRec (--)	CCA-AvgHel (cm/s^2)
VAL_1_0755_00	64	0	1	29.9688	0	1	1	66	78	118	91	74.7584	34.9138	1.18	1.23	2.82187	0.0247864	0.131764	0.184181	0.153742	0.202875	0.0554909	466.708	0.405444	0.374781	0.392689	0.00881413	0.0344912	698.726
VAL_1_0757_00	57	0	0	24.9108	0	0	0	84	72	107	83	68.9766	52.1667	1	1.12	1.99711	0.0291275	0.128374	0.0786208	0.105558	0.0149731	0.0133023	415.34	0.271497	0.145253	0.21345	0.00776251	0.023847	463.933
VAL_1_0767_00	71	0	1	30.9	0	1	0	60	43	82	86	242.891	153.818	1.25	1.59	1.55703	0.0303532	0.524488	0.312742	0.476762	0.0303341	0.0663414	4.46826	0.476919	0.294871	0.422675	0.00660549	0.0362049	7.68243
VAL_1_0782_00	54	0	1	21.5451	0	1	0	49	105	88	76	116.171	135.302	0.97	0.92	3.01004	0.0439519	0.229794	0.0632784	0.203093	0.0276424	0.0150227	918.375	0.437975	0.025871	0.271571	0.000535846	0.150129	687.79
VAL_1_0783_00	54	1	1	24.5156	1	0	1	121	57	159	102	115.55	89.2411	1.17	0.96	3.07089	0.0325693	0.275379	0.243173	0.268205	0.141535	0.0542012	342.156	0.585612	0.380983	0.535601	0	0.0607499	158.135
VAL_1_0788_00	70	0	1	20	0	0	1	95	83	82	89	94.0668	123.613	1.02	1.06	2.38219	0.0246777	0.132131	0.113057	0.125074	0.0893482	0.0364918	507.321	0.225121	0.136589	0.172043	0.0726545	0.0188339	1165.96
VAL_1_0789_00	67	0	0	24.9135	1	0	1	90	50	123	89	83.8684	95.1108	1.17	0.99	2.00264	0.0203512	0.346964	0.250342	0.314506	0.0173987	0.0739887	71.1731	0.305782	0.0721921	0.163628	0	0.00279252	172.709
VAL_1_0790_00	54	0	0	20.9566	0	0	0	64	99	130	86	84.4845	118.699	1.02	1.02	2.83983	0.0284554	0.0948814	0.0291825	0.0564596	0.126253	0.266368	1643.25	0.234547	0.0904554	0.145768	0.0290604	0.0528482	1548.18
VAL_1_0795_00	36	1	1	35.2653	1	1	0	98	60	74	91	132.155		1.17		2.09673	0.038133	0.131095	0.541017	0.247048	0.502783	0.301299	56.2183	0.224068	0.415446	0.284752	0.0500666	0.0227113	49.03
VAL_1_0797_00	63	0	0	27.7	1	1	0	116	48	84	88	1.45756	27.555	1.04	1.03	2.12889	0.0159107	0.114428	0.129257	0.114661	0.274689	0.0128117	691.265	0.349099	0.27658	0.312938	0.00826705	0.0306478	581.915
VAL_1_0798_00	40	0	0	26.4236	0	0	0	54	60	109	77	99.4625	82.5031	1.04	1.09	2.43388	0.0229847	0.0890672	0.0920852	0.0857128	0.519439	0.0190172	990.027	0.509392	0.569211	0.564013	0.0997569	0.139519	153.624
VAL_1_0800_00	50	0	0	20.8611	0	0	0	119	54	93	82	93.0269	96.1293	1.06	0.92	2.16049	0.0184778	0.187209	0.221588	0.197348	0.0683394	0.027515	623.266	0.387524	0.266756	0.340815	0.00440389	0.08259	379.066
VAL_1_0801_00	53	1	1	26.0299	1	0	0	71	35	139	77	140.127	87.2678	1.28	1.22	3.41868	0.01095	0.199104	0.0996484	0.183099	0.242724	0.278091	234.567	0.242113	0.162817	0.220527	0.0157507	0.0749934	1346.27
VAL_1_0805_00	57	1	1	33.0783	1	1	0	126	39	107	107	56.0123	77.4991	1.14	1.02	3.44829	0.0303976	0	0.224033	0.00461212	0.983598	0.375389	1841.63	0.0102924	0.465517	0.168907	0.647816	0.16981	1828.05
VAL_1_0809_00	72	0	1	30.1021	0	1	0	92	44	168	101	51.8951	70.5154	1.1	1.19	2.69309	0.0286268	0	0.122626	0.0156103	0.727757	0.0639424	1440.56	0.239722	0.194385	0.229936	0.156013	0.14306	1330.92
VAL_1_0810_00	62	0	1	39.1434	0	0	0	102	51	164	88	75.3515	47.0464	1.06	1.29	2.41631	0.0849156	0.244822	0.23384	0.245059	0.244857	0.0758088	518.167	0.0735664	0.0991895	0.0906168	0.0404765	0.0462532	1223.77
VAL_1_0819_00	79	0	1	25.1486	0	1	0	80	80	105	86	104.004	26.1596	1.06	0.99	2.1288	0.044248	0.258985	0.136783	0.203368	0.021557	0.109231	120.173	0.532821	0.150721	0.376188	0.00274049	0.052292	91.0775
VAL_1_0825_00	53	0	1	25.6369	0	0	0	61	77	92	66	50.7119	43.5164	1.08	0.99	2.23522	0.0424603	0.112397	0.124658	0.11513	0.151151	0.0647015	261.188	0.255532	0.273521	0.265414	0.132819	0.0452241	402.861
VAL_1_0837_00	38	0	0	24.623	1	0	0	43	92	130	81	0	63.0357	1.04	0.96	2.44673	0.0199077	0.0465518	0.149121	0.0534671	0.35252	0.30899	644.517	0.0354116	0.17764	0.111319	0.0656097	0.0194323	1103.05
VAL_1_0867_00	55	0	0	25.3934	0	0	0	92	59	120	75	106.629	44.9177	1.11	0.98	3.14861	0.0309429	0.342478	0.0712213	0.258738	0.0516156	0.025805	168.187	0.439785	0.16257	0.359746	0.00976435	0.141577	517.68
VAL_1_0868_00	64	0	1	28.764	0	1	1	50	78	82	143	39.4898	83.3852	1.05	1.06	3.16683	0.0128124	0.0535416	0.0335202	0.0372237	0.111903	0.030478	988.135	0.13627	0.0902599	0.110009	0.208019	0.0304912	2099.84
VAL_1_0881_00	66	0	1	24.3046	0	1	1	55	48	109	92	123.198	97.3283	0.99	1.13	2.46222	0.0223251	0.228515	0.234209	0.237201	0.0637402	0.126171	248.668	0.474461	0.388567	0.441401	0.00835588	0.06188	297.143
VAL_1_0884_00	84	0	0	23.4221	1	0	0	64	100	101	70	46.0294	64.1641	1.01	1.09	2.1896	0.0127971	0.102116	0.259811	0.187592	0.0306844	0.0869096	144.92	0.200823	0.261234	0.219066	0.00117353	0.0171966	303.737
VAL_1_0885_00	86	1	0	32.8769	1	1	0	58	51	71	122	81.1335	54.3618	1.23	1.27	1.49414	0.0193779	0.0995967	0.55975	0.269423	0.371011	0.154569	20.9059	0	0.192494	0.0389943	0.3474	0.00370597	44.6692
VAL_1_0886_00	73	0	0	20.2812	1	1	0	93	54	105	82	189.664	58.8906	1.12	1.36	2.08245	0.0519966	0.477542	0.239255	0.324806	0.0352713	0.0758751	10.0704	0.239135	0.214305	0.240481	0.0348464	0.0129547	51.1634
VAL_2_0250_00	45	1	0	31.9	0	1		235	35	73	82	55.1878		1.12		2.06823	0.0262351	0.00307838	0.0881448	0.0184229	0.634846	0.302366	130.531	0.100124	0.207336	0.156713	0.0998115	0.0248009	72.8453
VAL_2_0253_00	51	1	0	25.1	0	1		113	52	86	106	140.703	70.8129	1.01	0.99	2.18425	0.029458	0.434482	0.329747	0.402613	0.0178394	0.104036	153.443	0.374162	0.236698	0.319449	0	0.0535877	166.068
VAL_2_0264_00	41	1	0	22.8	0	1		94	38	72	80	58.0546		1.02		1.70718	0.0299381	0.203275	0.048916	0.174531	0.0136763	0.0304295	31.4551	0.395624	0.153233	0.283932	0	0.0319026	20.3781
VAL_3_0265_00	56	1	0	26.3	0	0		88	58	141	81	66.9424	45.103	1.07	1.26	1.82987	0.0210584	0.155501	0.156445	0.162044	0.160402	0.0925237	567.658	0.402737	0.309448	0.359385	0.00819543	0.0144129	159.696
VAL_3_0266_00	43	1	0	26.8	0	0		129	46	164	76	84.5761	79.5003	1.02	0.86	2.00945	0.0547437	0.0177308	0.0867063	0.0540936	0.253897	0.0129308	797.925	0.10061	0.123467	0.103572	0.0629116	0.0627177	644.709
VAL_3_0268_00	57	0	0	22.6	0	0						56.4362	9.21977	1.06	0.93	2.64043	0.0494224	0.1421	0.0418835	0.121297	0.0744719	0.057017	390.584	0.373566	0.156934	0.293755	0.0700692	0.132663	432.592
VAL_3_0277_00	61	1	0	27.7	0	1	0	89	61	129	93	50.1391	62.6162	1.24	1.51	2.30477	0.0203979	0.252697	0.309468	0.290372	0.207565	0.145023	13.3965	0.605152	0.522835	0.588014	0.0234777	0.101798	8.09095
VAL_3_0287_00	48	1	0	27.1	0	0		472	39	105	103	63.973	85.2309	1.07	0.89	2.42503	0.0245358	0.032002	0.273819	0.0591191	0.671586	0.25414	53.8448	0.258526	0.386462	0.334361	0.104206	0.117447	30.9952
VAL_3_0292_00	53	0	0	26.4	0	1	0	67			85	137.662	183.028	0.99	1.19	2.65803	0.0203746	0.0313172	0.109685	0.0547935	0.442268	0.278339	96.6648	0.0334402	0.198064	0.111031	0.0220579	0.0312023	76.7331
VAL_3_0295_00	49	0	1	53.9				223	35	101	74	121.875	129.018	1.05	1.03	1.7464	0.0284581	0.074309	0.088414	0.075431	0.164819	0.0101344	42.642	0.260863	0.258802	0.251449	0.0552346	0.0258036	47.6102
VAL_5_0257_00	64	1	0	26.5	0	1		111	39	87	82	95.9811	57.9596	1.14	1.13	2.79768	0.0333921	0.177495	0.102889	0.155997	0.0426141	0.0626935	125.062	0.389055	0.25115	0.343454	0.0493998	0.14051	204.325
VAL_5_0269_00	53	1	0	27.1	0	1						114.861	17.5987	1.12	1.14	3.05133	0.0366324	0.282972	0.183745	0.258238	0.108891	0.134393	230.956	0.305227	0.160209	0.272604	0.01039	0.0965282	412.61
VAL_5_0273_00	63	1	0	25.1	0	1		47	109	74	96	194.809	21.1903	1.13	1.05	2.91286	0.0478203	0	0.200838	0.0459565	0.433636	0.0913615	352.564	0.0991872	0.318391	0.219569	0.301486	0.165125	426.598
VAL_5_0279_00	67	1	0	25	0	1		57	48	67	94	94.1636	85.4845	1.23	1.29	1.32781	0.0184354	0.167896	0.0753267	0.123653	0.0554513	0.00147879	24.5654	0.61348	0.506298	0.563635	0.0344725	0.0193797	9.06311
VAL_5_0286_00	65	1	0	23.2	0	1		92	88	57	81	86.4115	90.019	1.09	1.14	2.01225	0.0389932	0.186059	0.311945	0.25465	0.13741	0.110262	9.3244	0.399002	0.368772	0.386163	0.0261316	0.0316588	8.95682
VAL_5_0293_00	59	0	0	23.3	0	1						125.375	118.64	1.25	1.08	1.93154	0.0280529	0.170735	0.0498631	0.103563	0.0908656	0.135603	41.489	0.139776	0.0454124	0.0902181	0.0216204	0.05158	53.637
